# Supplementary figures and images for: Dual oxidase 1 limits the IFNγ-associated antitumor effect of macrophages
Source: PubMed Central journal article supplement — J Immunother Cancer. 2020 Jun 21;8(1):e000622. doi: 10.1136/jitc-2020-000622 (PMC7307581; doi:10.1136/jitc-2020-000622), 2020-06-21

## Figure S1

**A**  
Biopsy from non-irradiated Human lung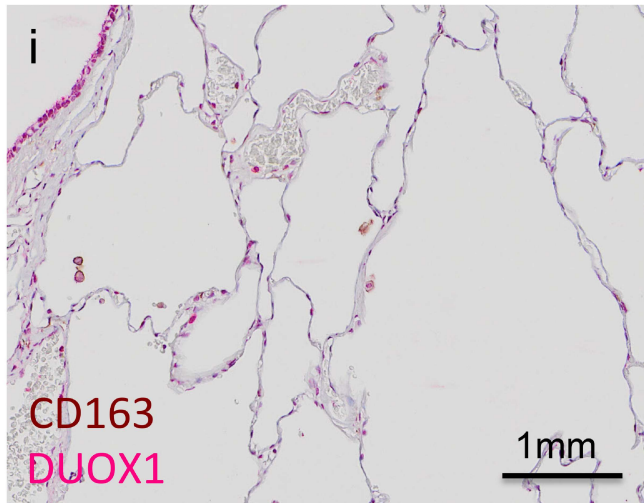**B**  
Biopsy from irradiated Human lung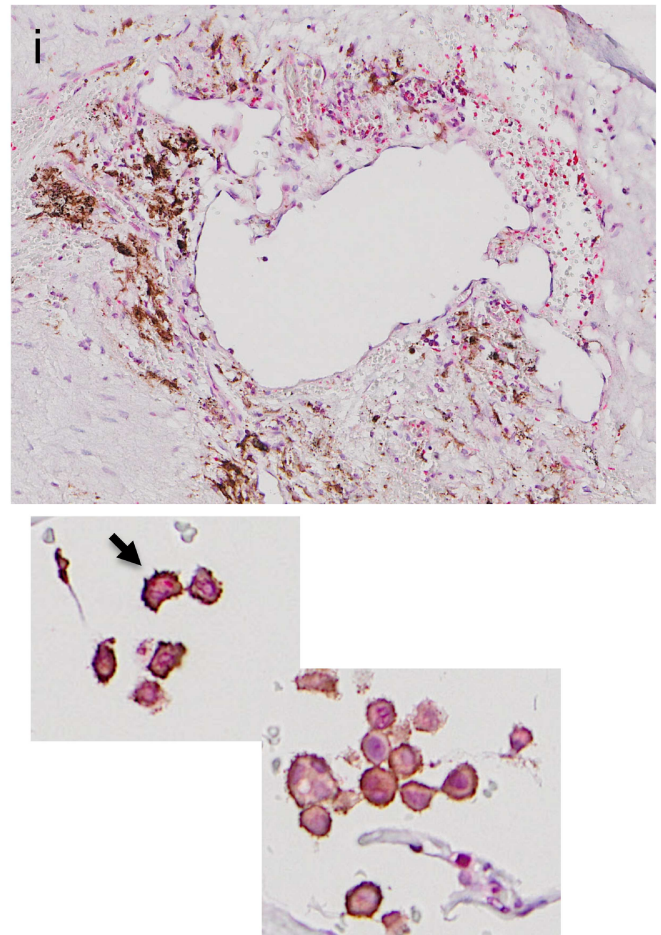

Supplement: jitc-2020-000622supp002.pdf [file jitc-2020-000622supp002.pdf]

Figure S2

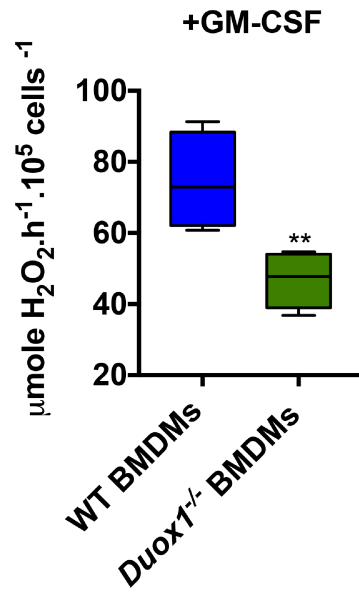

Supplement: jitc-2020-000622supp003.pdf [file jitc-2020-000622supp003.pdf]

Figure S3

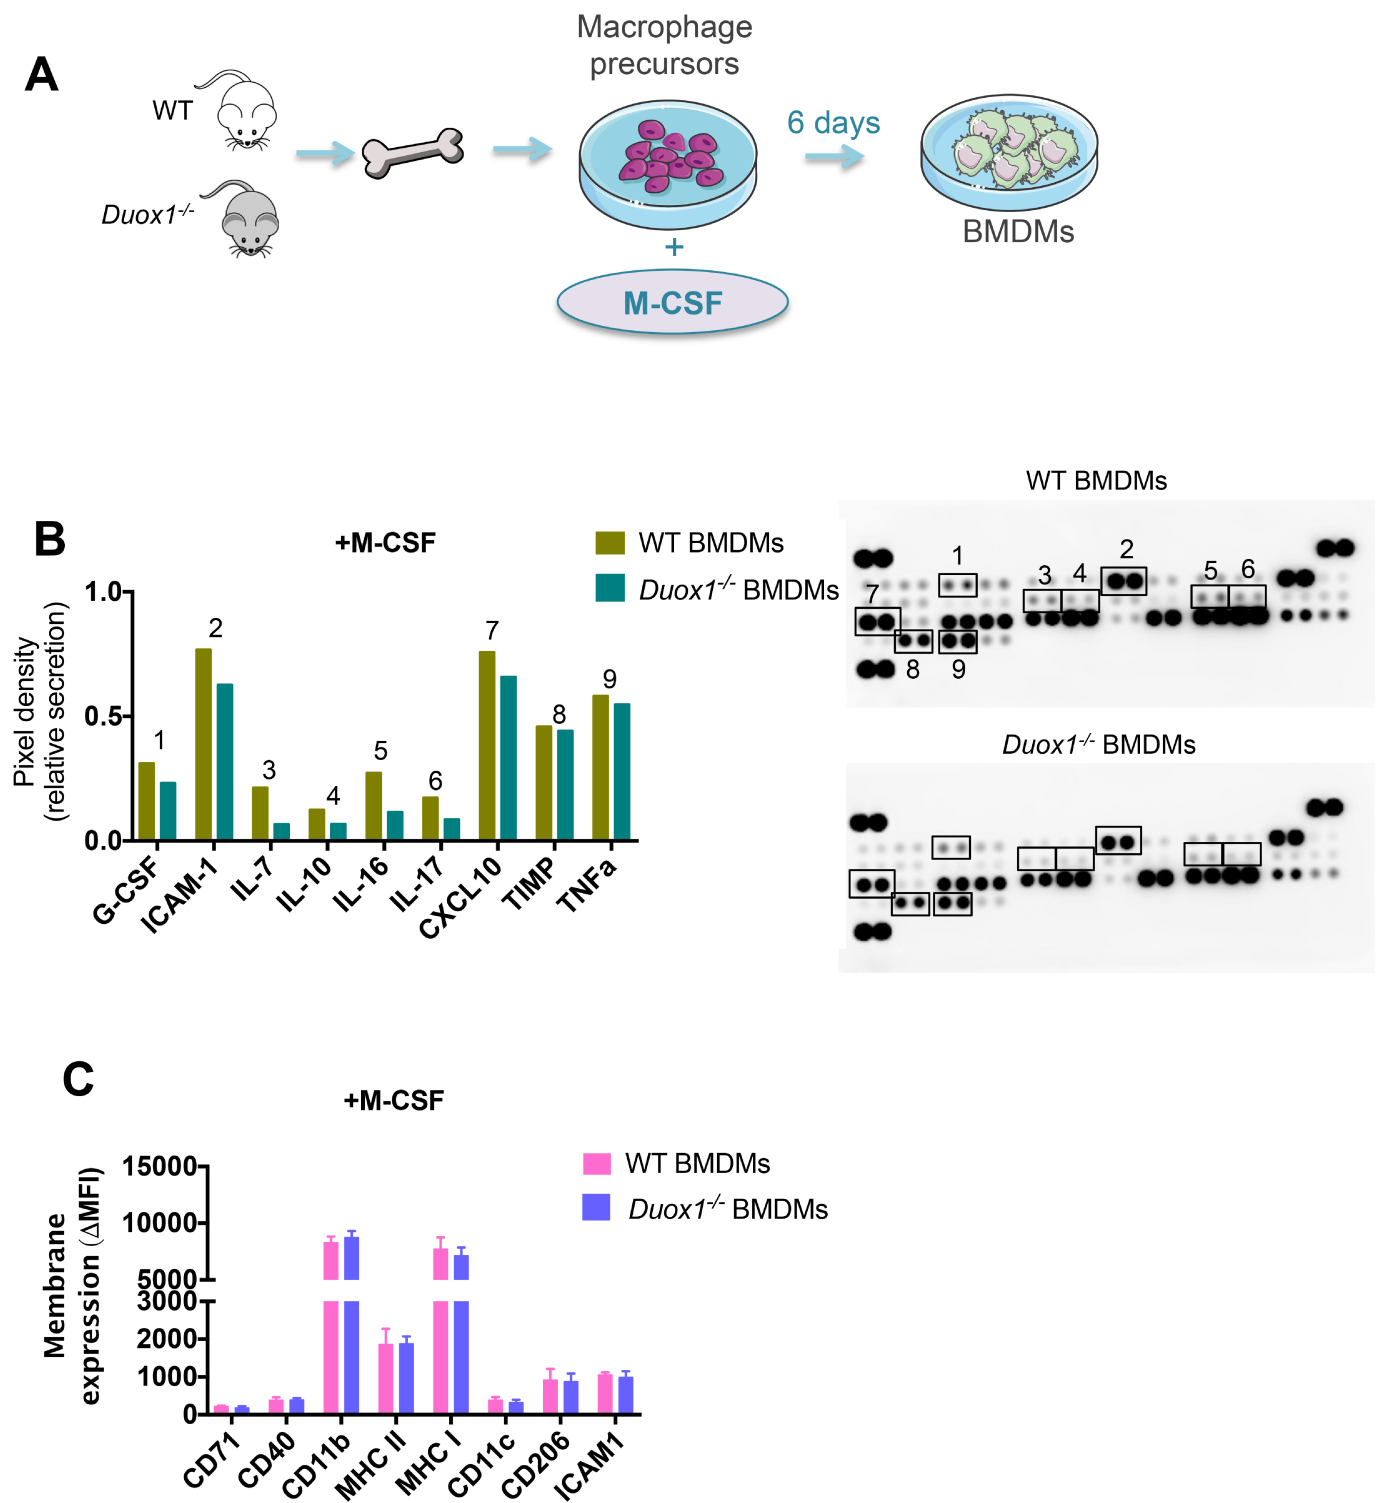

Supplement: jitc-2020-000622supp004.pdf [file jitc-2020-000622supp004.pdf]

## Figure S4

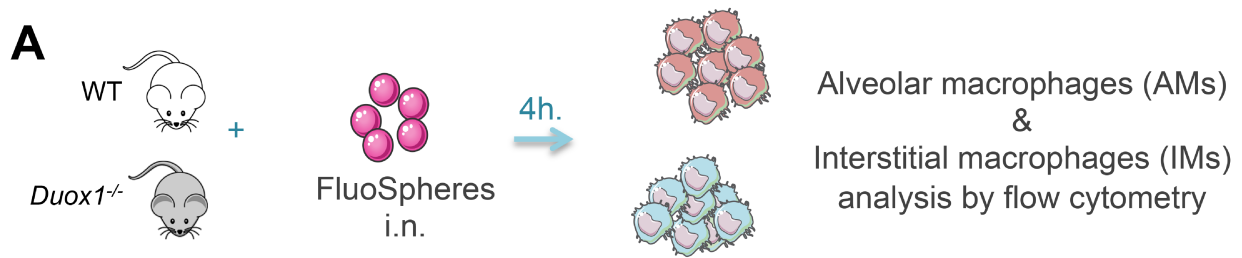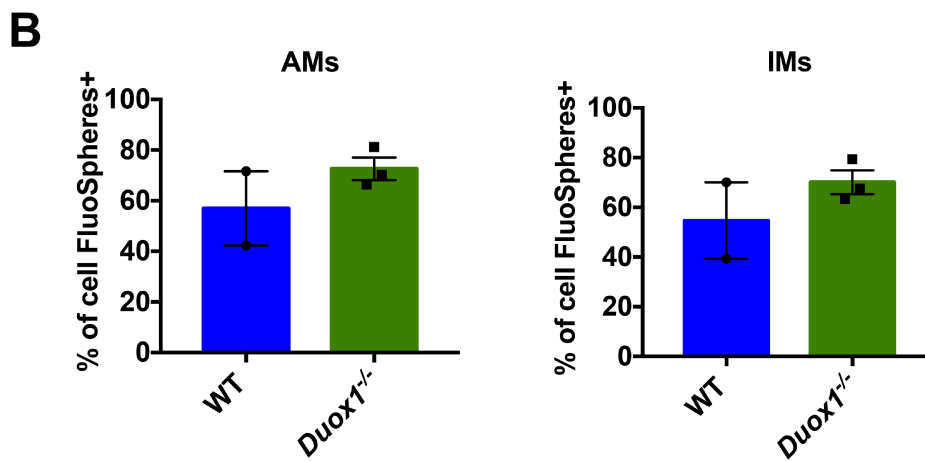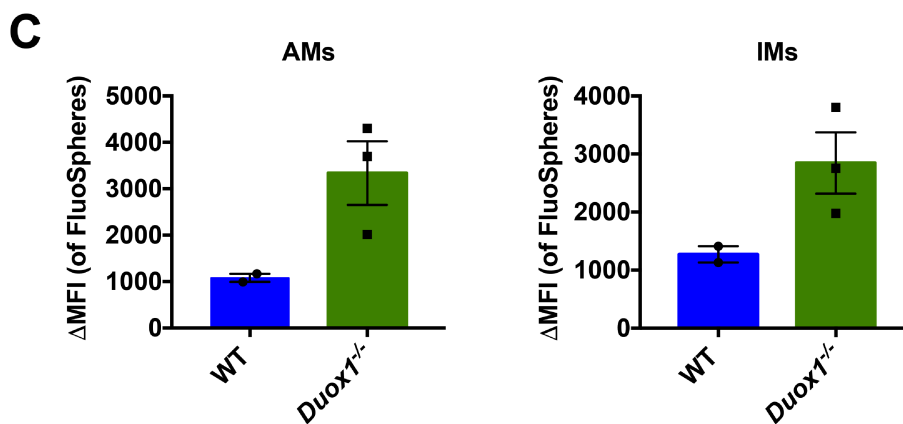

Supplement: jitc-2020-000622supp005.pdf [file jitc-2020-000622supp005.pdf]

Figure S5

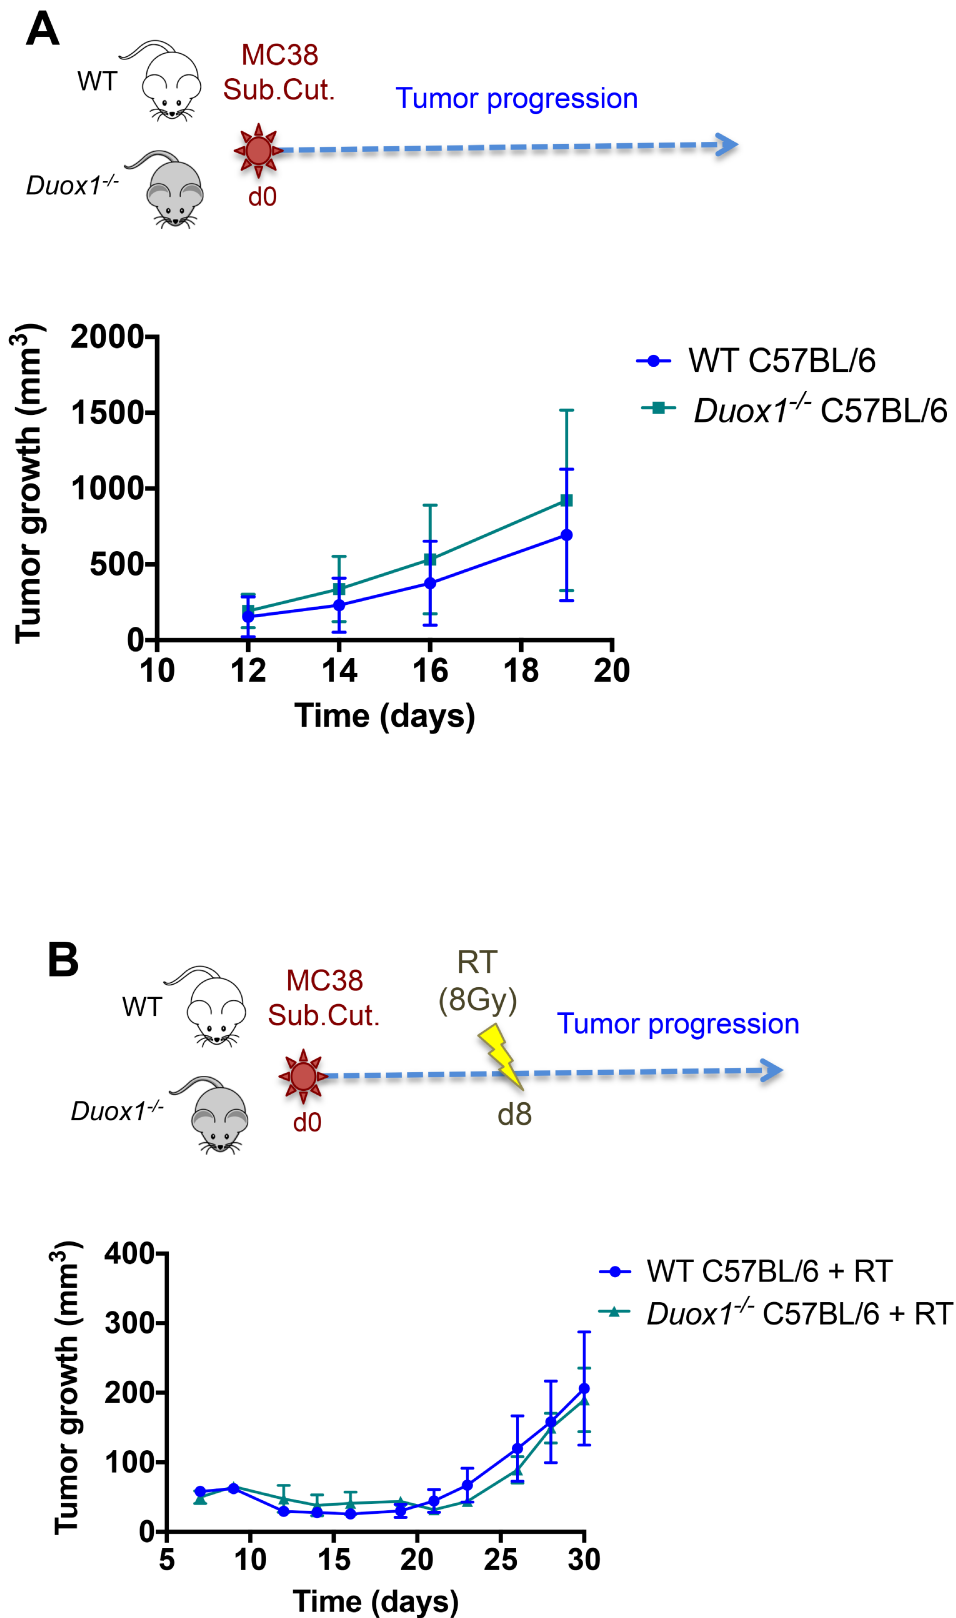

Supplement: jitc-2020-000622supp006.pdf [file jitc-2020-000622supp006.pdf]

## Figure S6

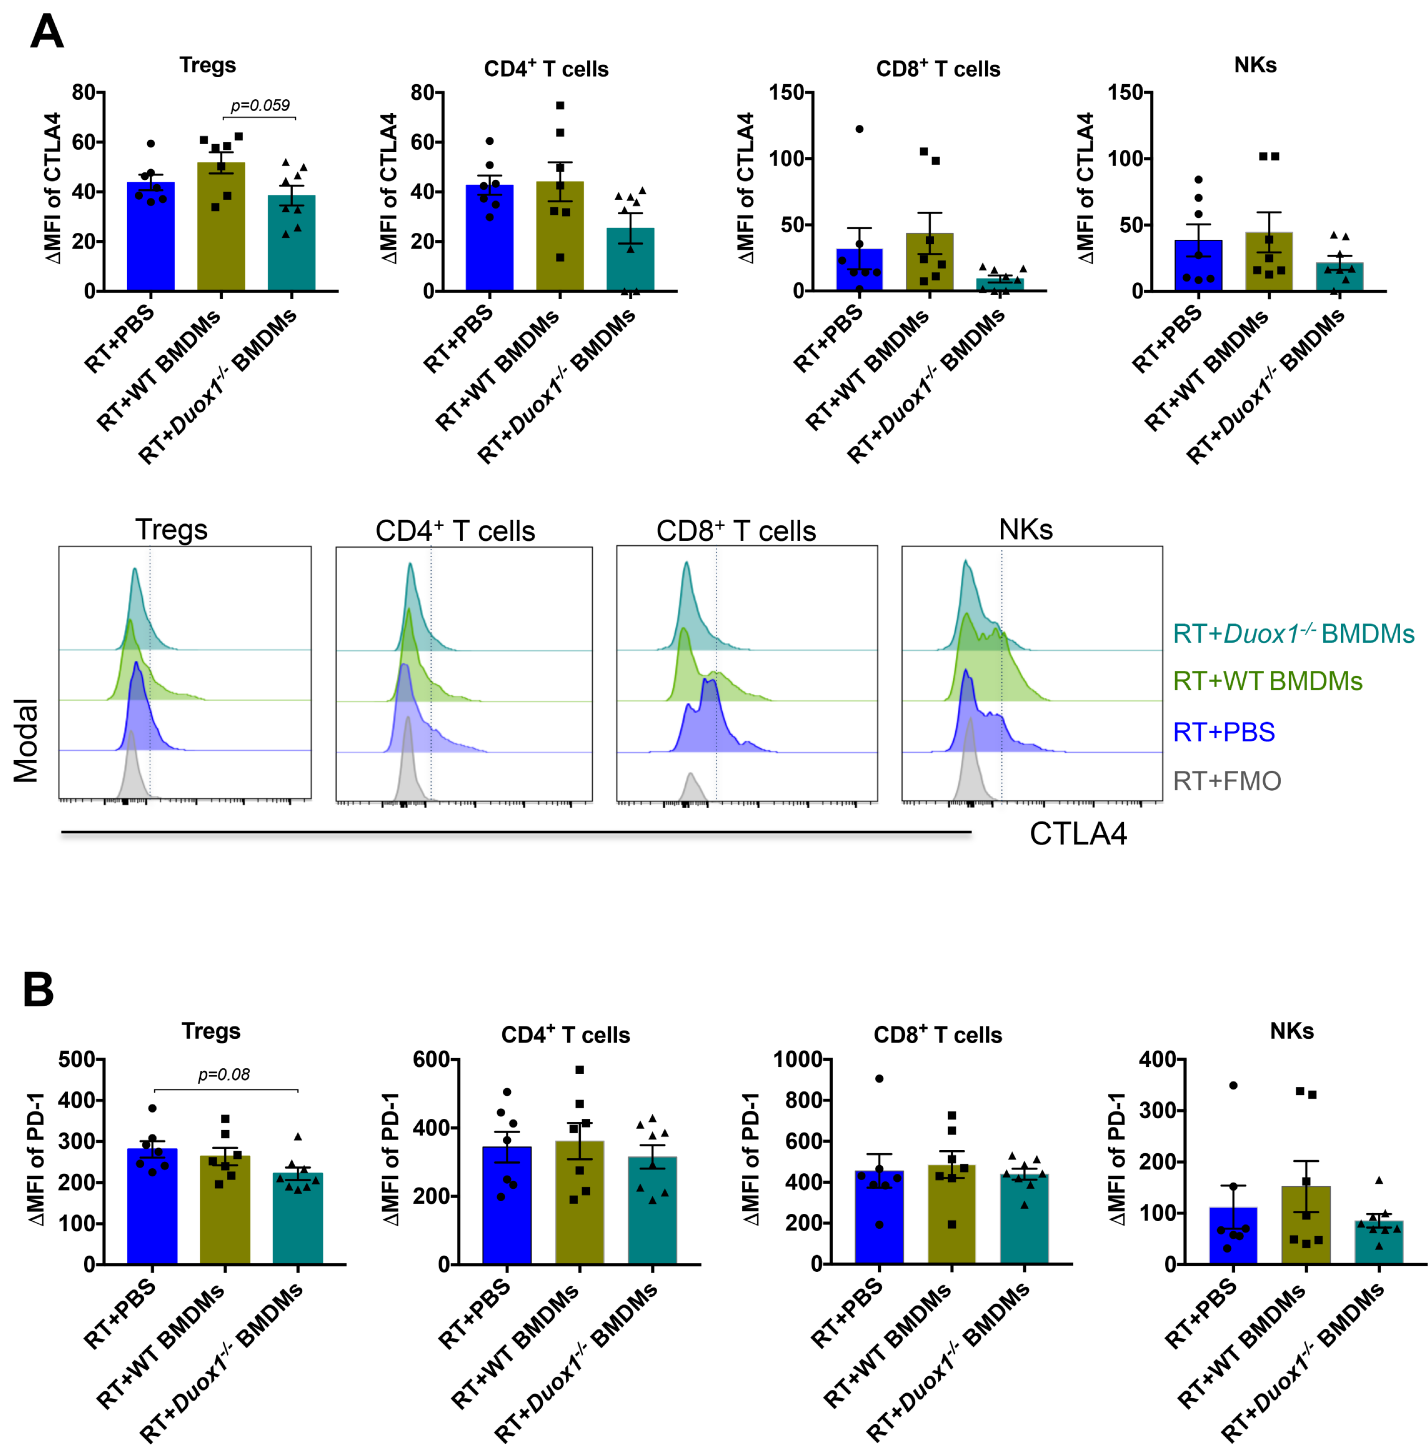

Supplement: jitc-2020-000622supp007.pdf [file jitc-2020-000622supp007.pdf]

Figure S7

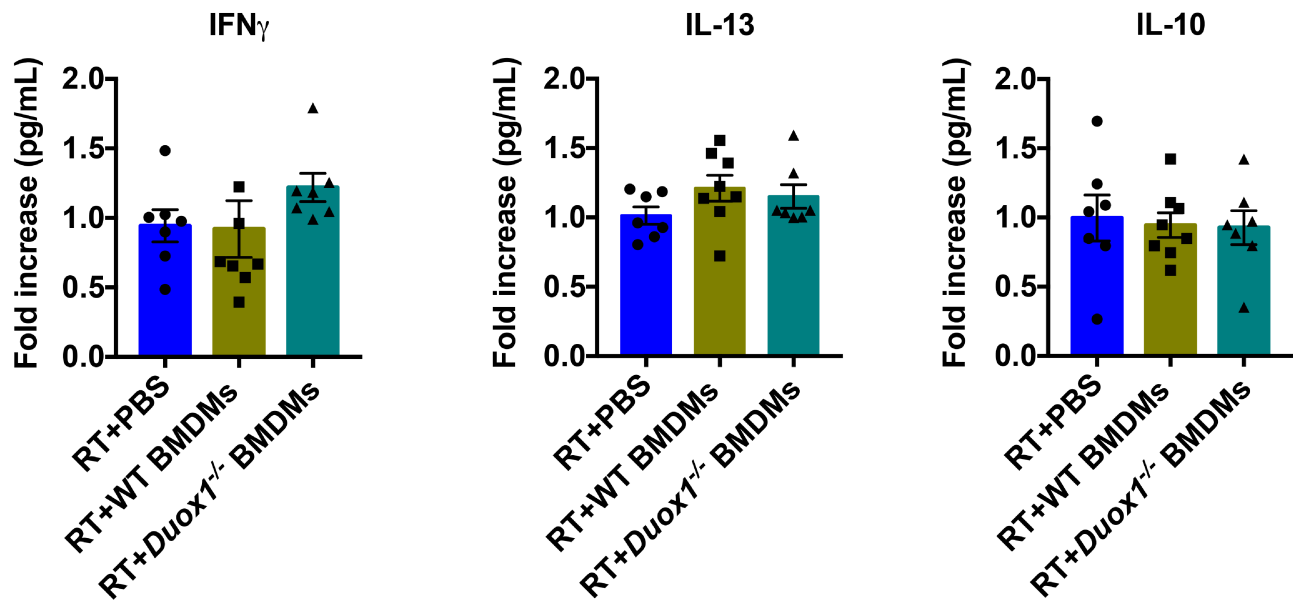

Supplement: jitc-2020-000622supp008.pdf [file jitc-2020-000622supp008.pdf]
